# Supplementary material for: Long Noncoding RNA NEAT1 Aggravates Aβ-Induced Neuronal Damage by Targeting miR-107 in Alzheimer's Disease
Source: PubMed Central journal article supplement — Yonsei Med J. 2019 Jun 24;60(7):640–50. doi: 10.3349/ymj.2019.60.7.640 (PMC6597469; doi:10.3349/ymj.2019.60.7.640), 2019-06-24
Supplement: ymj-60-640-s001.pdf [file ymj-60-640-s001.pdf]

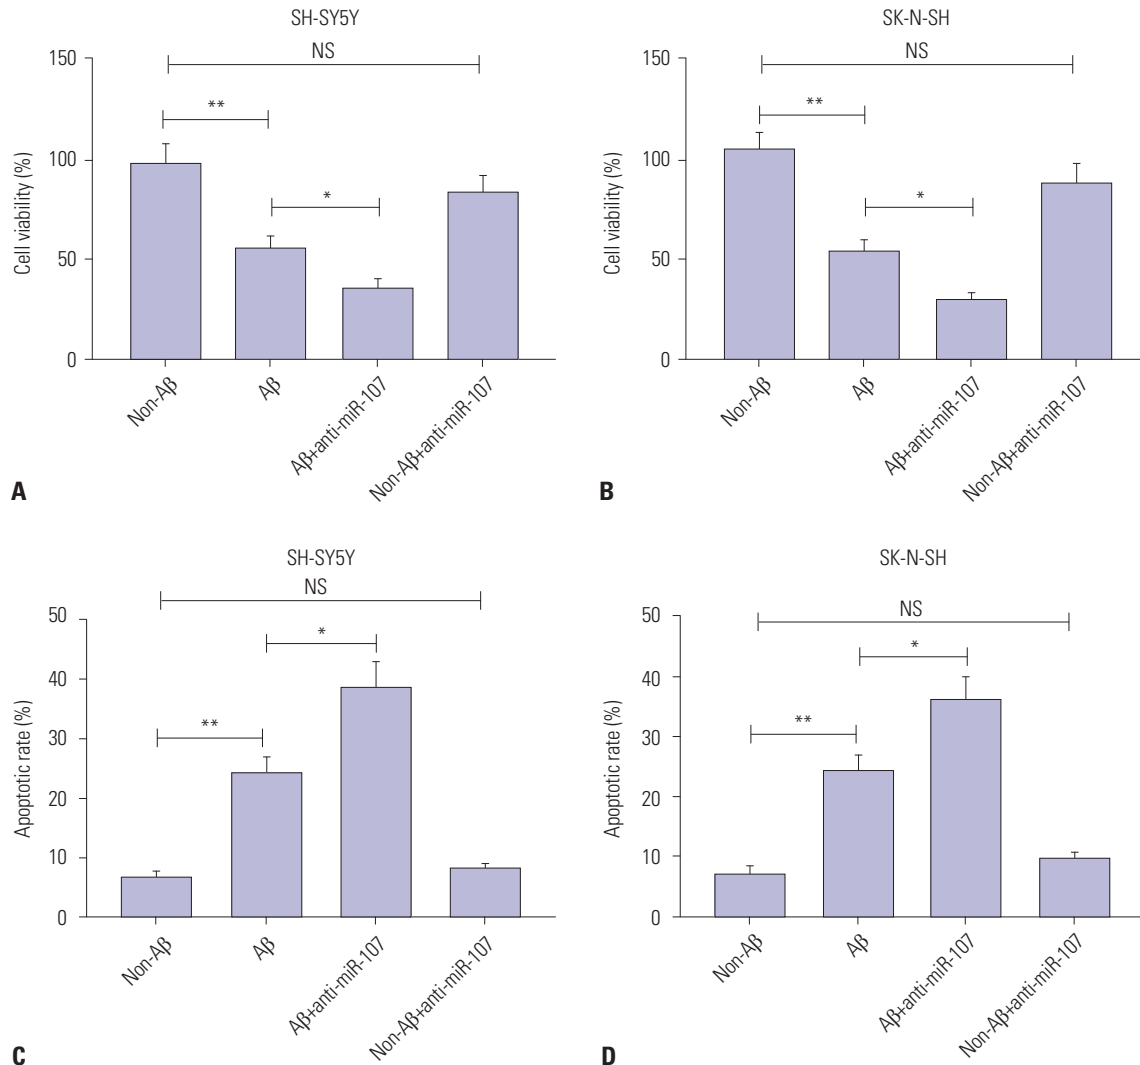

**Supplementary Fig. 1.** The effect of miR-107 on A $\beta$ -induced neuronal damage in SH-SY5Y and SK-N-SH cells. SH-SY5Y and SK-N-SH cells were transfected with or without anti-miR-107 and then treated with A $\beta$  or not. Cell viability (A and B) and apoptosis (C and D) were measured in the two cell lines by MTT or flow cytometry. \* $p$ <0.05, \*\* $p$ <0.01, A $\beta$ , amyloid  $\beta_{1-42}$ ; NS: not significant.
